# Supplementary material for: New features of edge-selectively hydroxylated graphene nanosheets as NIR-II photothermal agent and sonothermal agent for tumor therapy
Source: Royal Society of Chemistry journal article supplement (doi:10.1039/d4tb00866a), 2024-01-01
Supplement: d4tb00866a1.pdf [file d4tb00866a1.pdf]

## Supplementary Information

### New features of edge-selectively hydroxylated graphene nanosheets as NIR-II photothermal agent and sonothermal agent for tumor therapy†

Wenqian Zhang, ‡<sup>a</sup> Man Fan, ‡<sup>a</sup> Ruchao Yang,<sup>a</sup> Zhihao Li,<sup>a</sup> Yuzhi Qiu,<sup>a</sup> Mengna Dong,<sup>a</sup> Peng Song,<sup>a</sup> Nan Wang,<sup>a</sup> Yajiang Yang<sup>ab</sup> and Qin Wang<sup>\*abc</sup>

<sup>a</sup> Hubei Key Laboratory of Bioinorganic Chemistry and Materia Medica, School of Chemistry and Chemical Engineering, Huazhong University of Science and Technology, Wuhan, 430074, China. E-mail: qwang@hust.edu.cn

<sup>b</sup> National Engineering Research Center for Nanomedicine, Wuhan 430074, China

<sup>c</sup> Key Laboratory of Material Chemistry for Energy Conversion and Storage (Huazhong University of Science & Technology), Ministry of Education, Wuhan, 430074, China

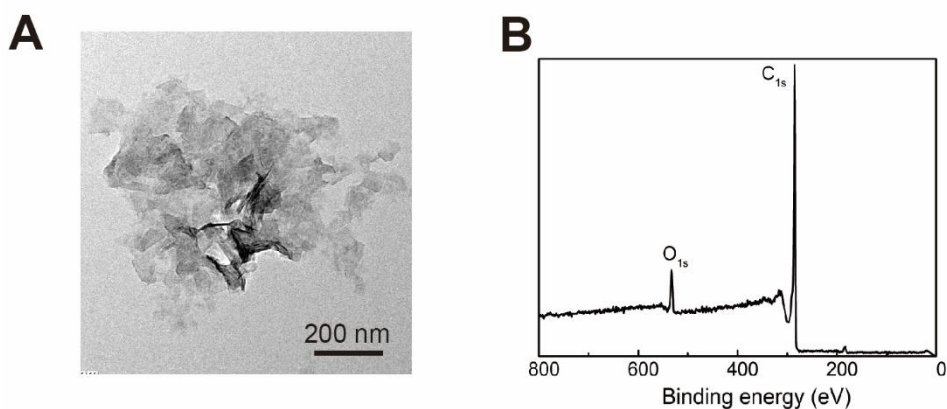

**Fig. S1.** (A) SEM image of the E2. (B) XPS spectrum of the E1.

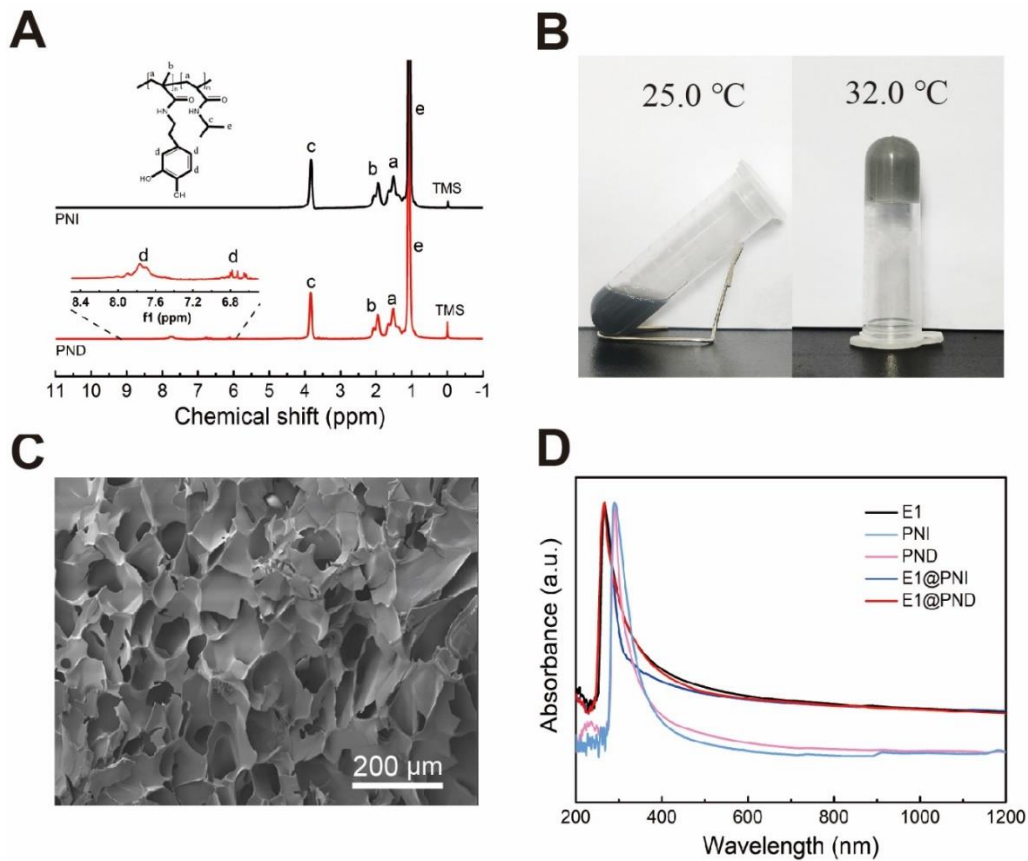

**Fig. S2.** (A)  $^1\text{H}$  NMR spectra of the PND and PNI nanogels. (B) Photos showing a sol-gel phase transition of the injectable E1@PNI hydrogel. (C) SEM image of the forming PND hydrogel. (D) Normalized UV-Vis-NIR spectra of the E1, PNI, PND, E1@PNI and E1@PND dispersion.

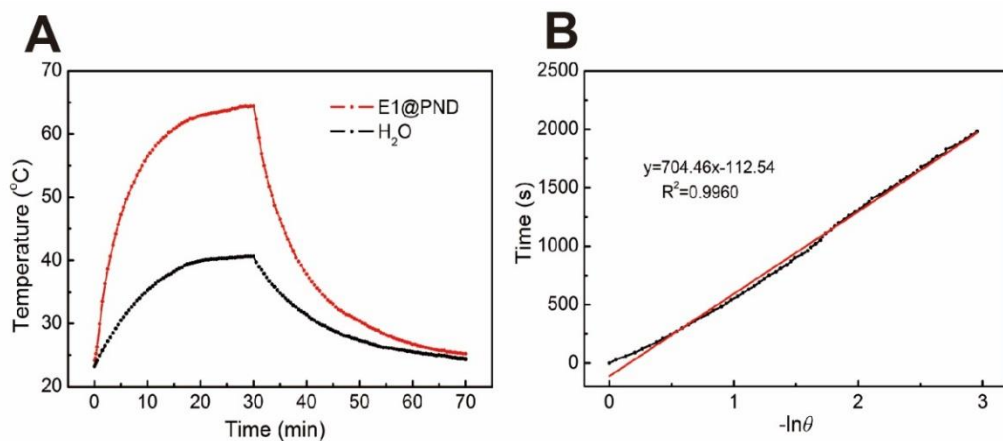

**Fig. S3.** Photothermal conversion efficiency of the injectable E1@PND hydrogel. (A) Heating and cooling curve. (B) Plots of time *versus*  $-\ln\theta$  based on Fig. S3A.

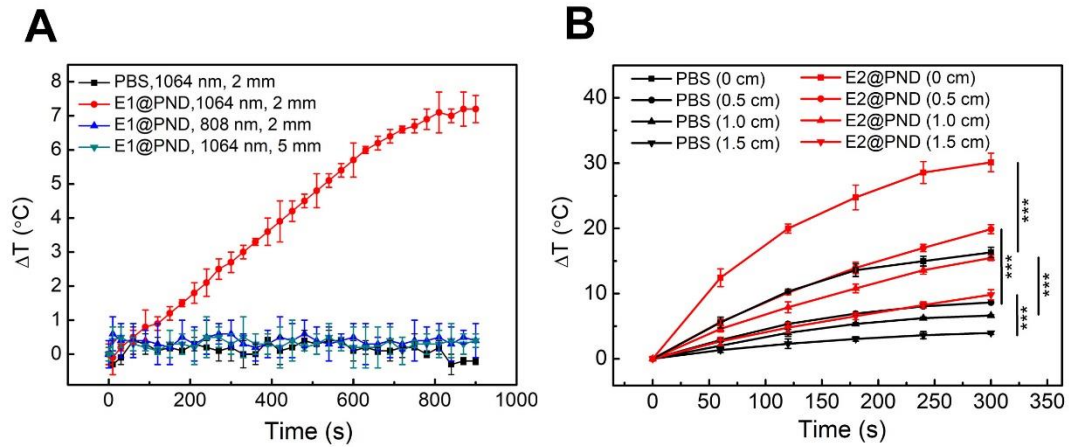

**Fig. S4.** (A) Photothermal performances of the injectable E1@PND hydrogel covered by chicken breast tissue with different thickness under 1064 and 808 nm laser irradiation ( $1.0 \text{ W cm}^{-2}$ ), respectively. (B) Sono-thermal performances of the injectable E2@PND hydrogel covered by pork tissue with different thickness under ultrasound exposure ( $3.0 \text{ MHz}$ ,  $1.8 \text{ W cm}^{-2}$ , 60% duty cycle).

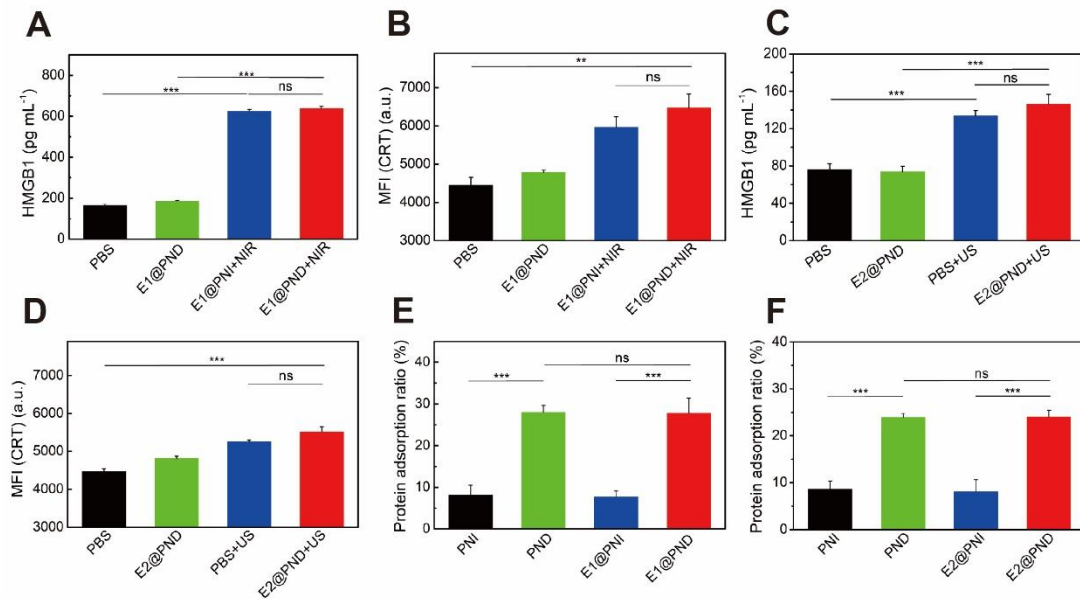

**Fig. S5.** Changes of ICD markers induced by NIR-II PTT and STT based on the injectable EHG@PND hydrogel. (A, C) Extracellular release amount of HMGB1 from 4T1 cells after various treatments ( $n=3$ ). (B, D) CRT exposure on 4T1 cells after various treatments ( $n=3$ ). (E-F) Protein adsorption ratio of the E1@PND and E2@PND hydrogels, respectively.

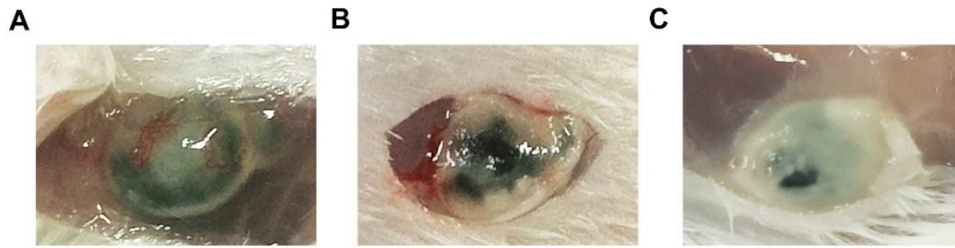

**Fig. S6.** Photos of the injectable E2@PND hydrogel at different times after subcutaneous injection. (A) Day 1. (B) Day 4. (C) Day 7.

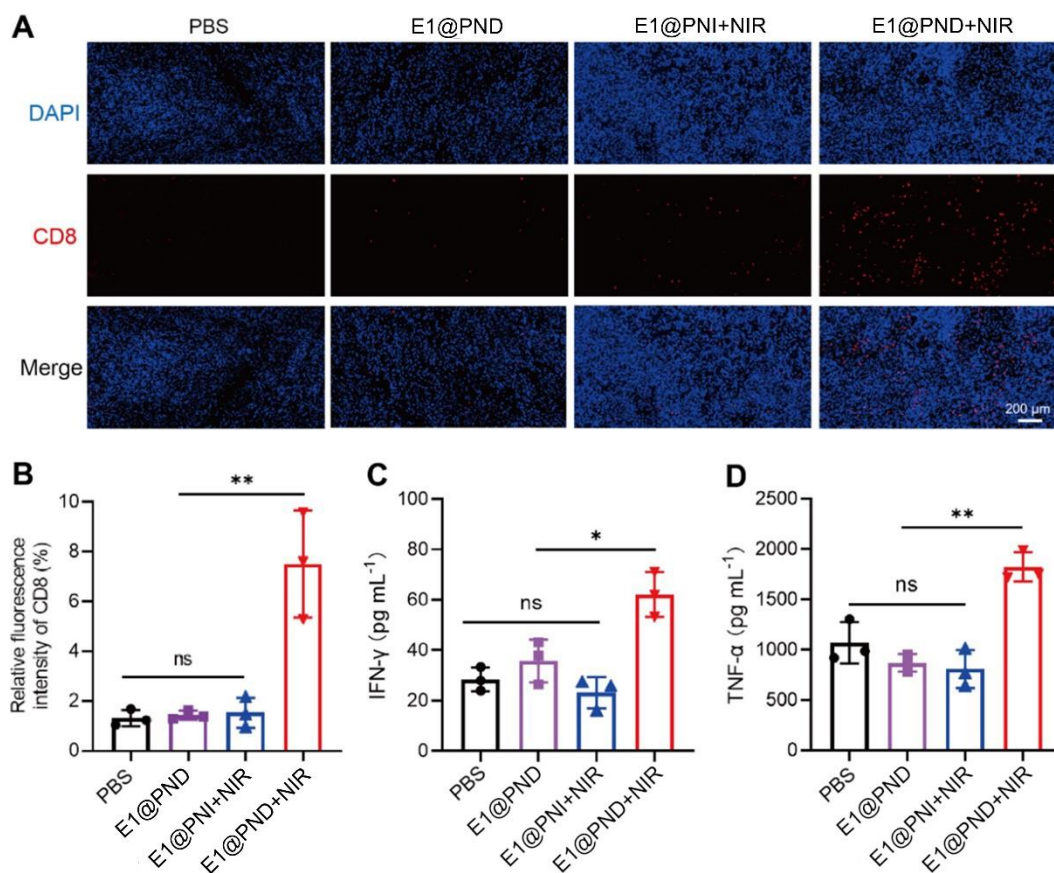

**Fig. S7.** Immune activation effects of the injectable E1@PND hydrogel-based PTT in the bilateral tumor experiments on day 8 post the first NIR-II laser irradiation. (A) Representative CD8 immunofluorescence staining images of the distal tumor tissues. (B) Quantitative statistical analysis of the CD8 level based on the immunofluorescence intensity ( $n=3$ ). (C) IFN- $\gamma$  level in mice sera ( $n=3$ ). (D) TNF- $\alpha$  level in mice sera ( $n=3$ ).

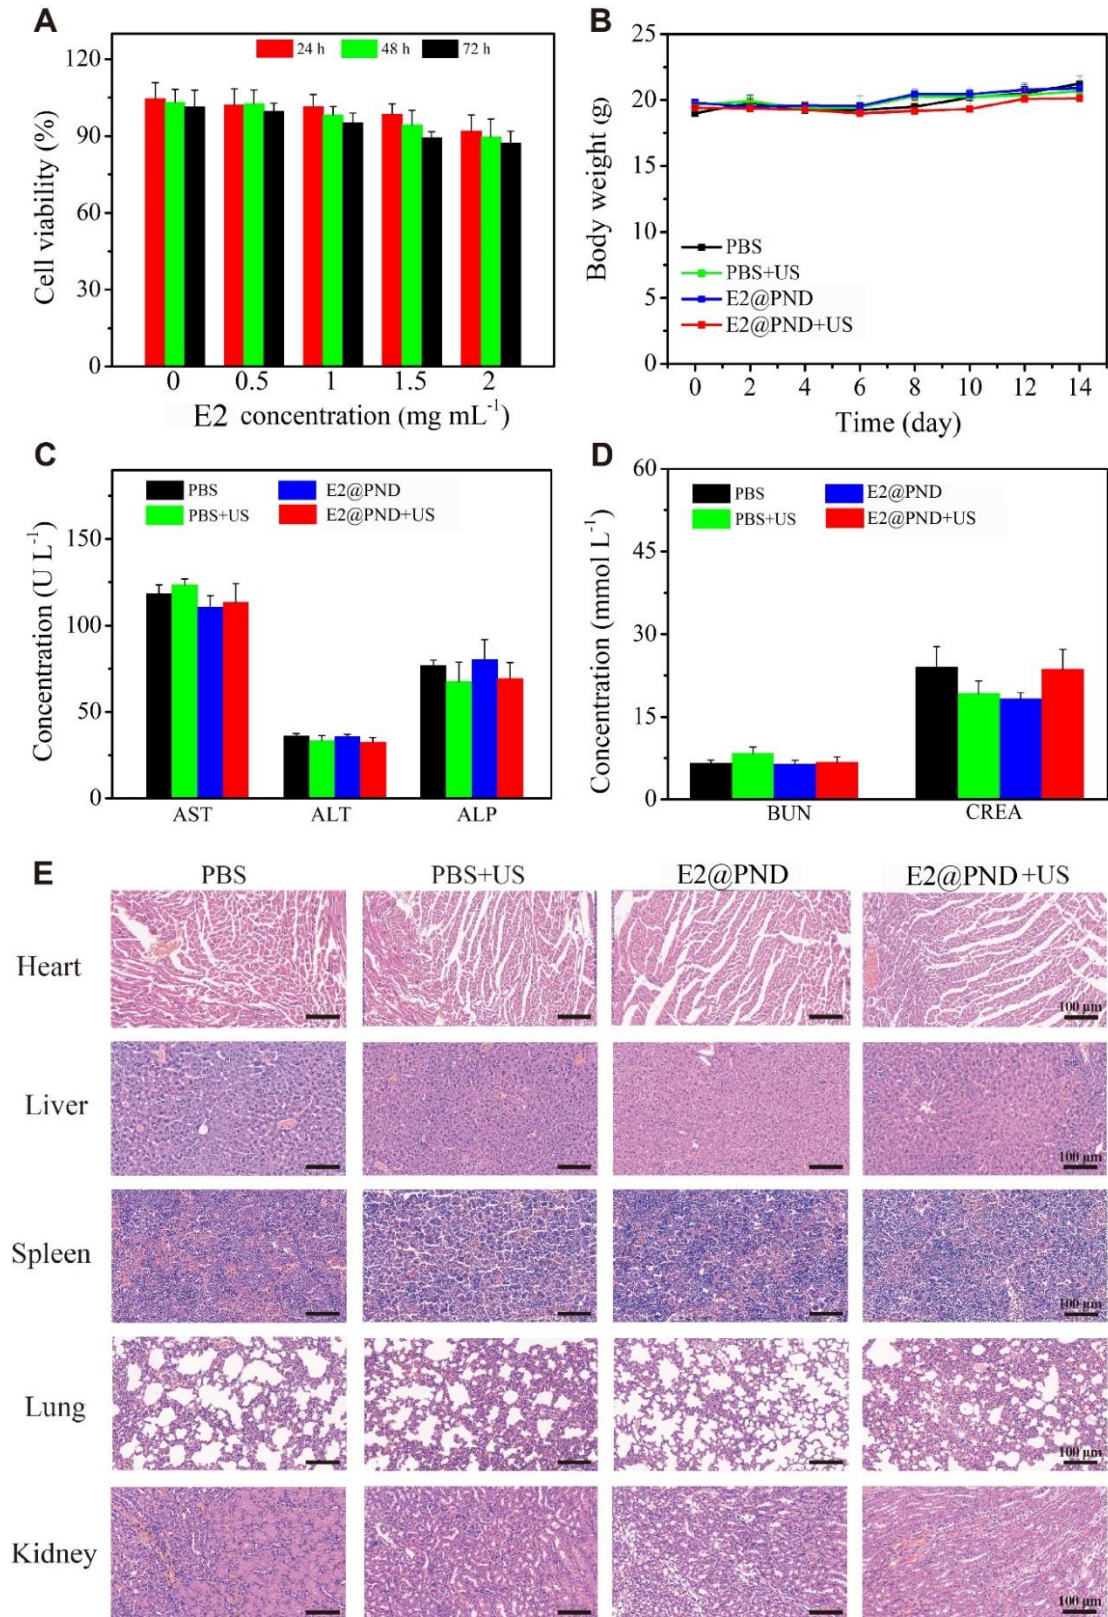

**Fig. S8.** Biosafety of the injectable E2@PND hydrogel-based STT. (A) Viability of HUVECs after co-incubation with the injectable E2@PND hydrogel containing various

amount of the E2 for 24 h, 48 h and 72 h, respectively ( $n=4$ ). (B) Body weight changes of 4T1-bearing mice during the STT treatment ( $n=4$ ). (C, D) Blood biochemistry analysis (AST, ALT, ALP, BUN, and CREA) of tumor-bearing mice treated by E2@PND-based STT. The sera are collected on day 14 after the first STT ( $n=3$ ). (E) H&E staining images of the heart, liver, spleen, lung, and kidney of mice on day 14 after the first STT.
